# Supplementary material for: From 3D channelled frameworks to 2D layered structures in molecular salts ofl-serine anddl-serine with oxalic acid
Source: Royal Society of Chemistry journal article supplement (doi:10.1039/c2nj40379j), 2012-08-02
Supplement: c2nj40379j.pdf [file c2nj40379j.pdf]

## Electronic Supplementary Information

### From 3D channelled frameworks to 2D layered structures in molecular salts of L-serine and DL-serine with oxalic acid

Dario Braga, Laura Chelazzi, Iacopo Ciabatti and Fabrizia Grepioni

Università di Bologna, Dipartimento di Chimica G. Ciamician, Via Selmi 2, 40126 Bologna

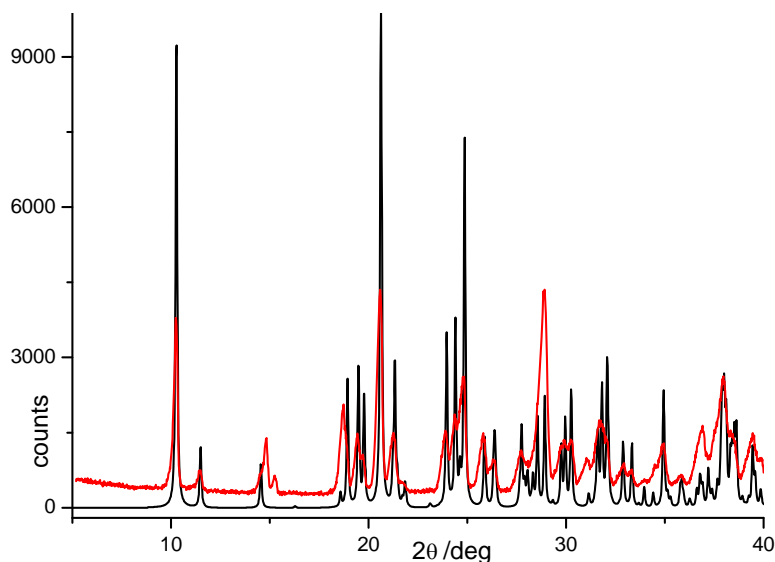

**Figure ESI-1.** Comparison of X-ray powder patterns for crystalline [DL-serH]<sub>2</sub>[ox]·2H<sub>2</sub>O, calculated on the basis of single crystal data (black line) and measured (red line) on the product of kneading of DL-serine and oxalic acid in 1:1 ratio. Residual peaks of oxalic acid are present in the experimental pattern.

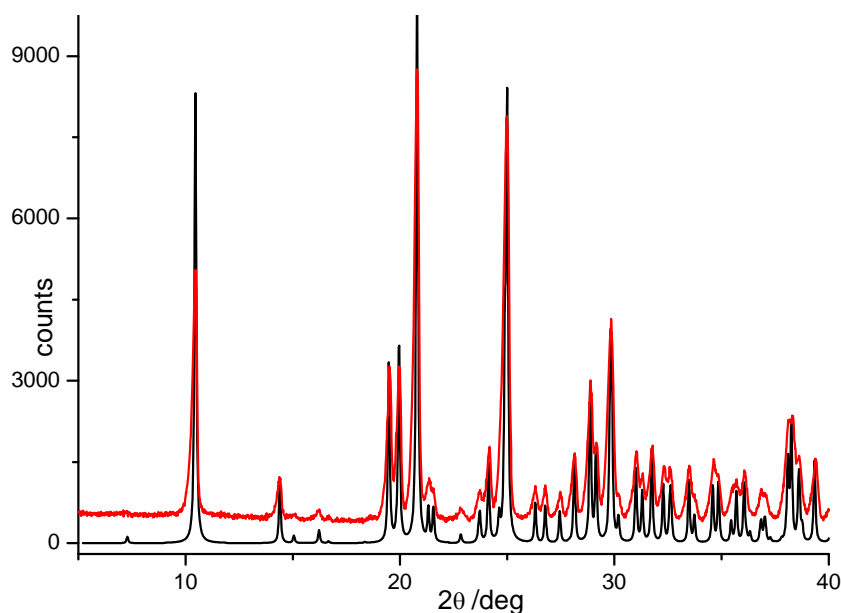

**Figure ESI-2.** Comparison of X-ray powder patterns for crystalline [L-serH]<sub>2</sub>[ox]·2H<sub>2</sub>O form I, calculated on the basis of single crystal data (black line) and measured (red line) on the product of kneading of L-serine and oxalic acid in 2:1 ratio.

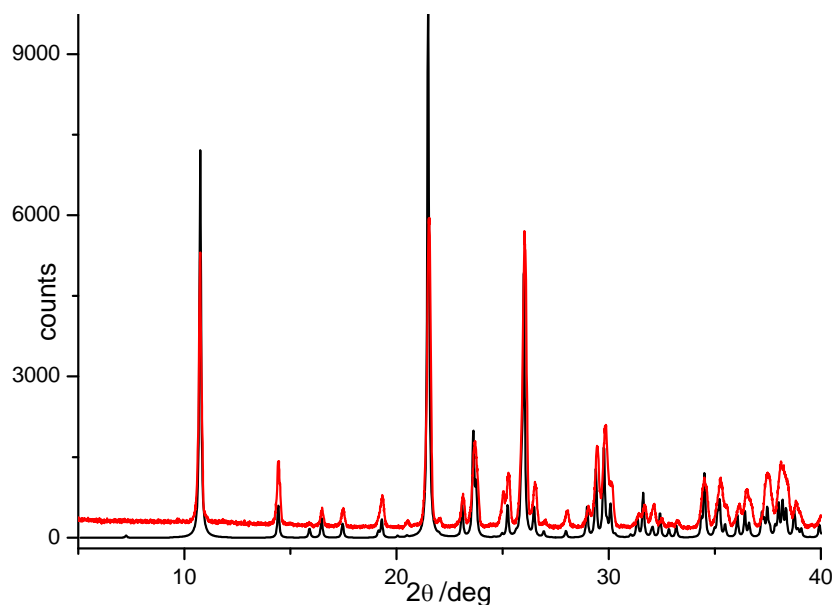

**Figure ESI-3.** Comparison of X-ray powder patterns for crystalline  $[\text{L-serH}]_2[\text{ox}] \cdot 2\text{H}_2\text{O}$  form II, calculated on the basis of single crystal data (black line) and measured (red line) on the product of grinding of L-serine and oxalic acid in 2:1 ratio.

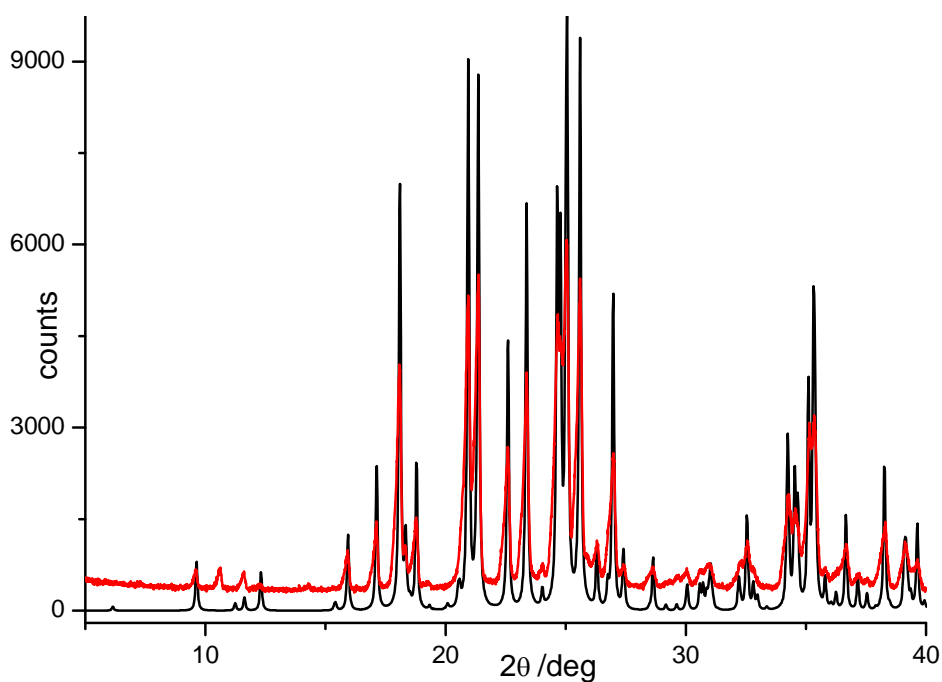

**Figure ESI-4.** Comparison of X-ray powder patterns for crystalline  $[\text{L-serH}][\text{Hox}]$ , calculated on the basis of single crystal data (black line) and measured (red line) on the product of grinding of L-serine and oxalic acid in 1:1 ratio.

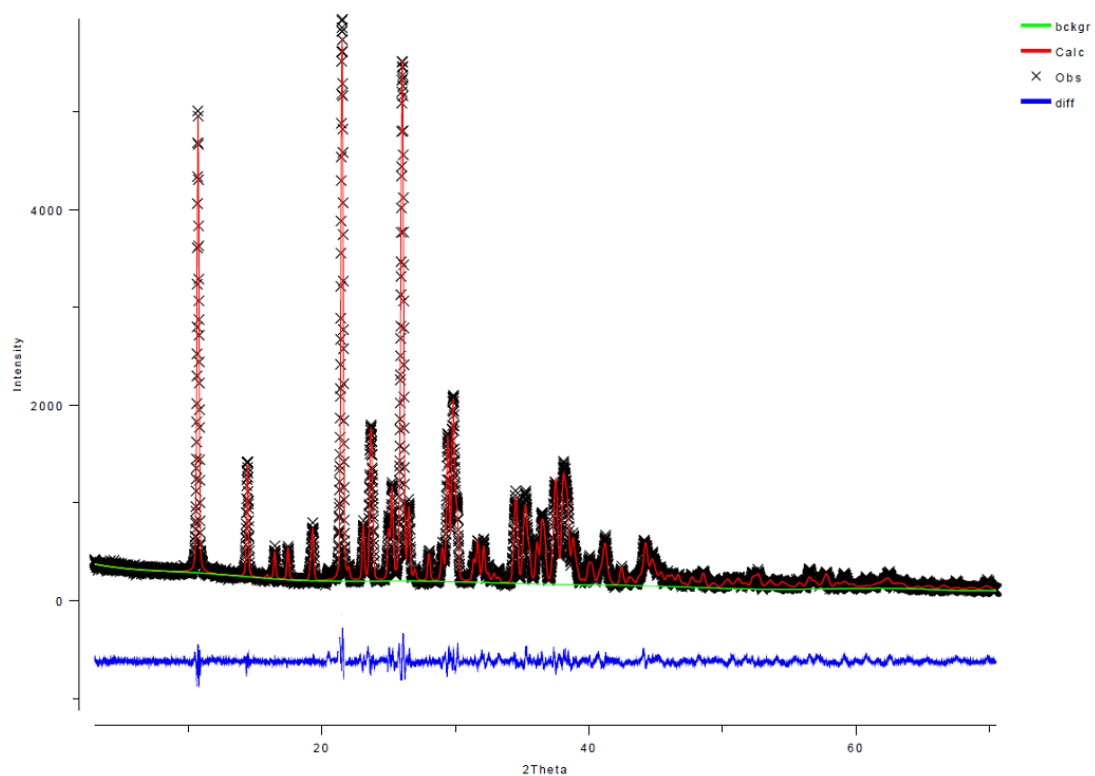

**Figure ESI-5.** Final Rietveld refinement plot for [L-serH]<sub>2</sub>[ox]·2H<sub>2</sub>O Form II

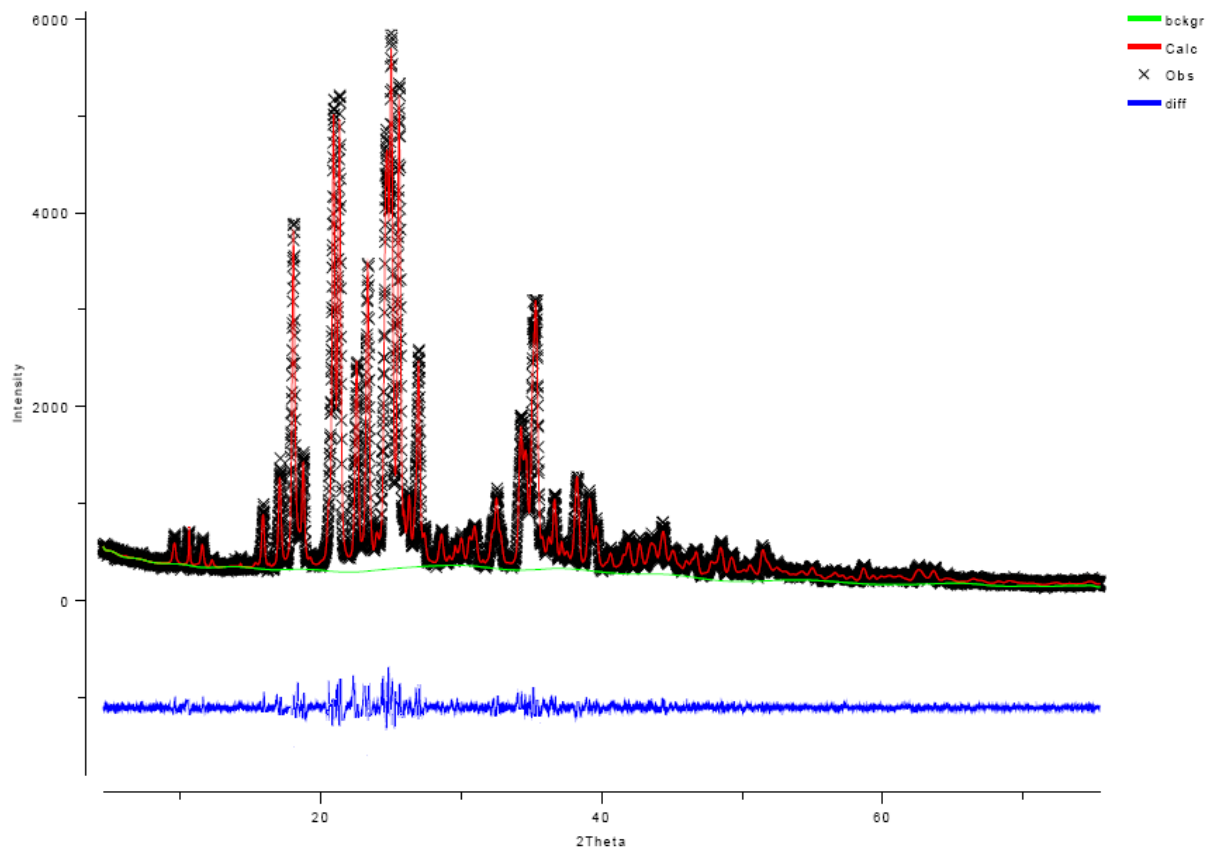

**Figure ESI-6.** Final Rietveld refinement plot for anhydrous [L-serH][Hox]

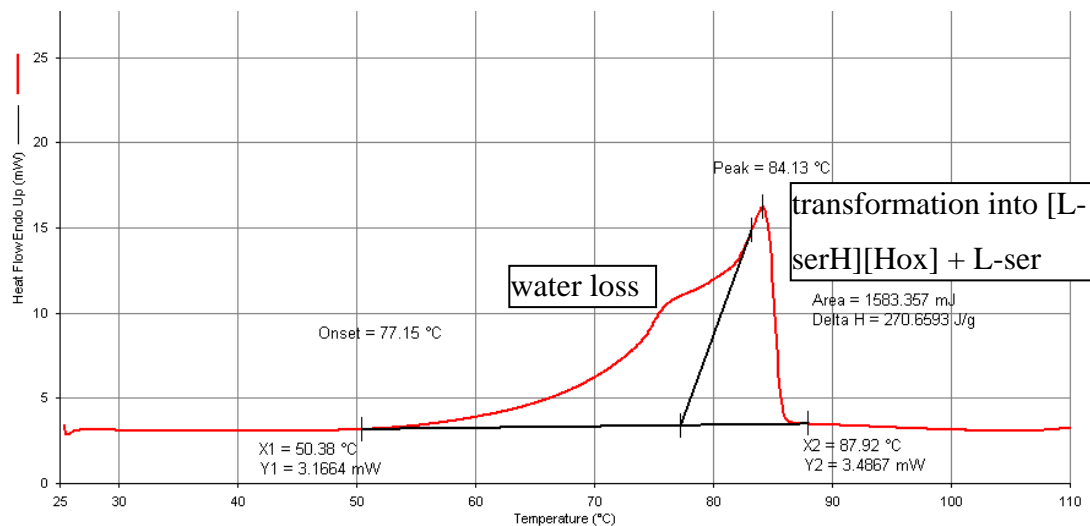

**Figure ESI-7.** DSC in open pan of [L-serH]<sub>2</sub>[ox]·2H<sub>2</sub>O form I : loss of water followed by transformation into [L-ser][Hox] + L-ser.

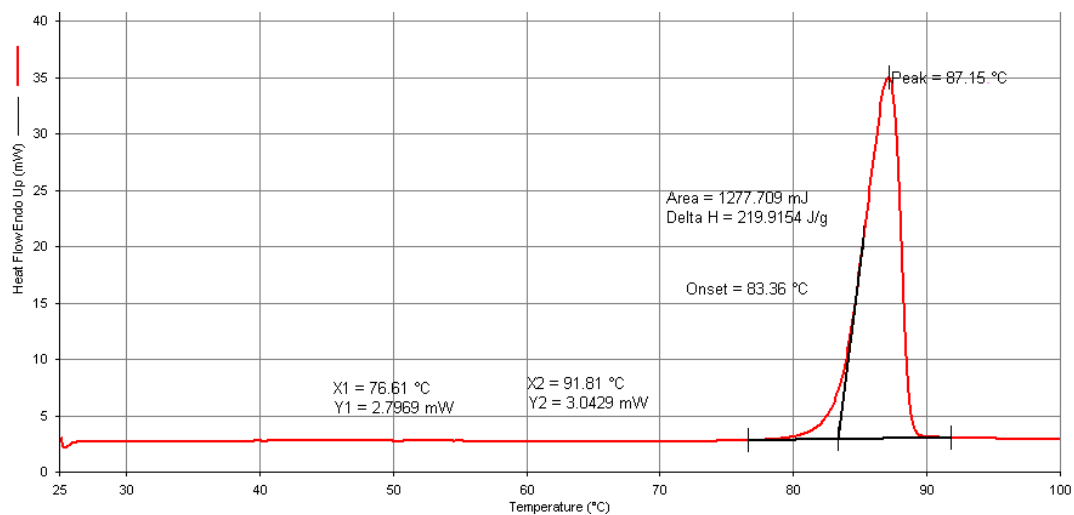

**Figure ESI-8.** DSC in sealed pan of [L-serH]<sub>2</sub>[ox]·2H<sub>2</sub>O form I (congruent melting).

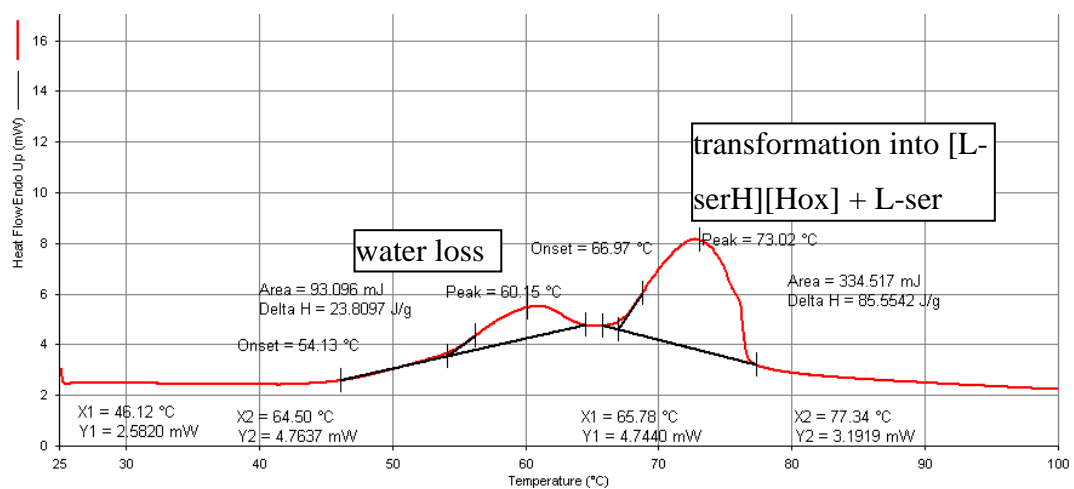

**Figure ESI-9.** DSC in open pan of [L-serH]<sub>2</sub>[ox]·2H<sub>2</sub>O form II: loss of water followed by transformation into [L-ser][Hox] + L-ser.

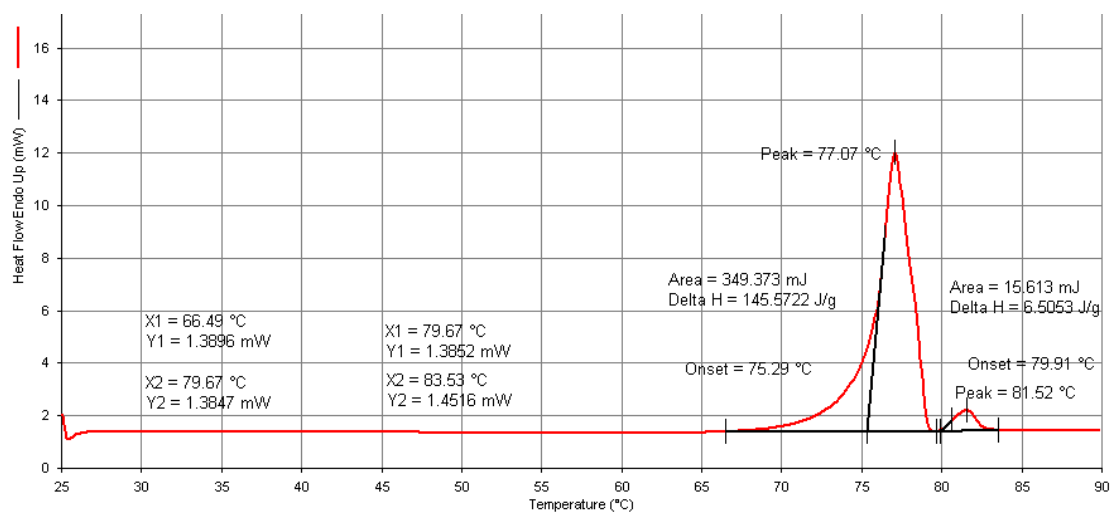

**Figure ESI-10.** DSC in sealed pan of [L-serH]<sub>2</sub>[ox]·2H<sub>2</sub>O form II.

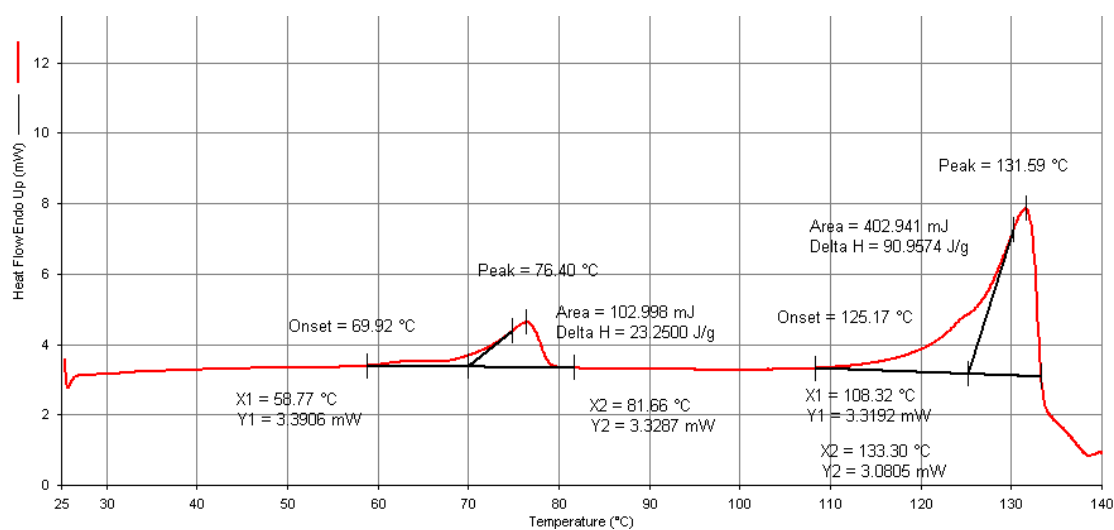

**Figure ESI-11.** DSC in open pan of [L-serH][Hox]: the first peak is due to an impurity of Form II.

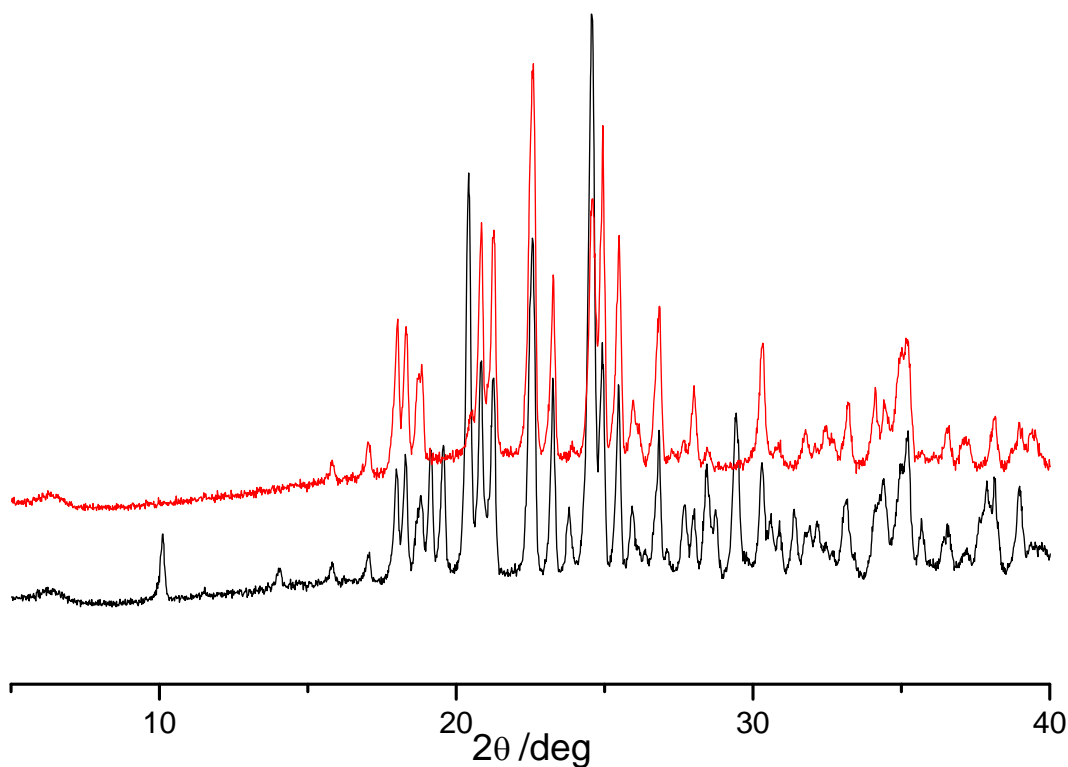

**Figure ESI-12.** Variable temperature X-ray powder diffraction measurements for [L-serH]<sub>2</sub>[ox]·2H<sub>2</sub>O form I: at 80°C (black line) partial transformation into [L-serH][Hox] plus L-ser is observed, which is complete at 85°C (red line).

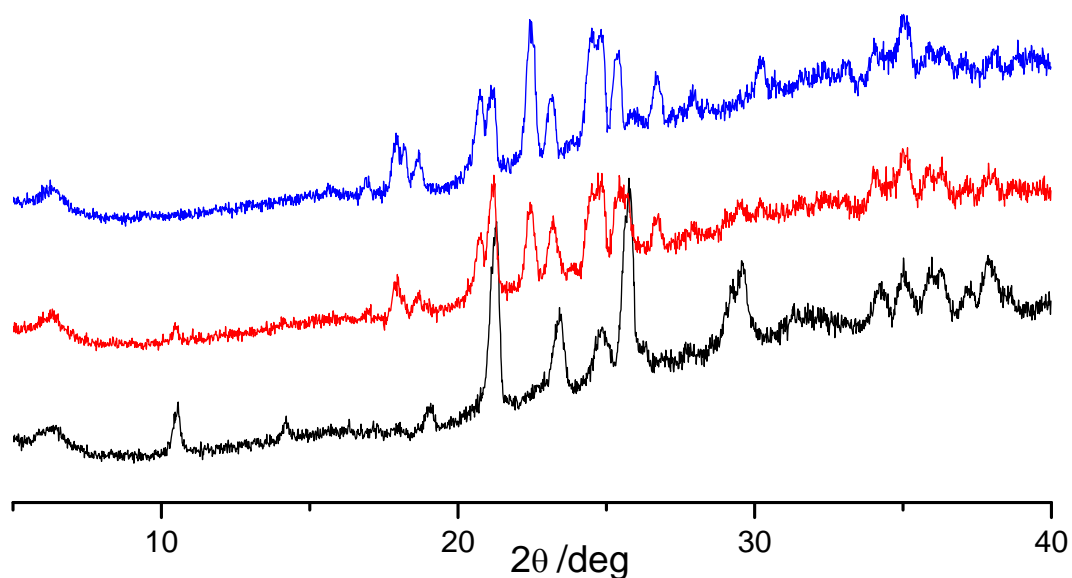

**Figure ESI-13.** Variable temperature X-ray powder diffraction measurements for [L-serH]<sub>2</sub>[ox]·2H<sub>2</sub>O form II (black line at RT): at 70°C (red line) partial transformation into [L-serH][Hox] plus L-ser is observed, which is complete at 75°C (blue line).
